# Supplementary material for: Real-Time Monitoring and Step-by-Step Guidance for Transcatheter Tricuspid Annuloplasty Using Transesophageal Echocardiography
Source: MDPI journal article supplement (doi:10.3390/jcdd9120415), 2022-11-25
Supplement: s1 [file s1]

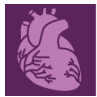

Supplementary Materials

# Real-Time Monitoring and Step-by-Step Guidance for Transcatheter Tricuspid Annuloplasty Using Transesophageal Echocardiography

Yu Liu, Wei Li, Daxin Zhou, Xiaochun Zhang, Dehong Kong, Zhenyi Ge, Haiyan Chen, Xianhong Shu, Cuizhen Pan and Junbo Ge

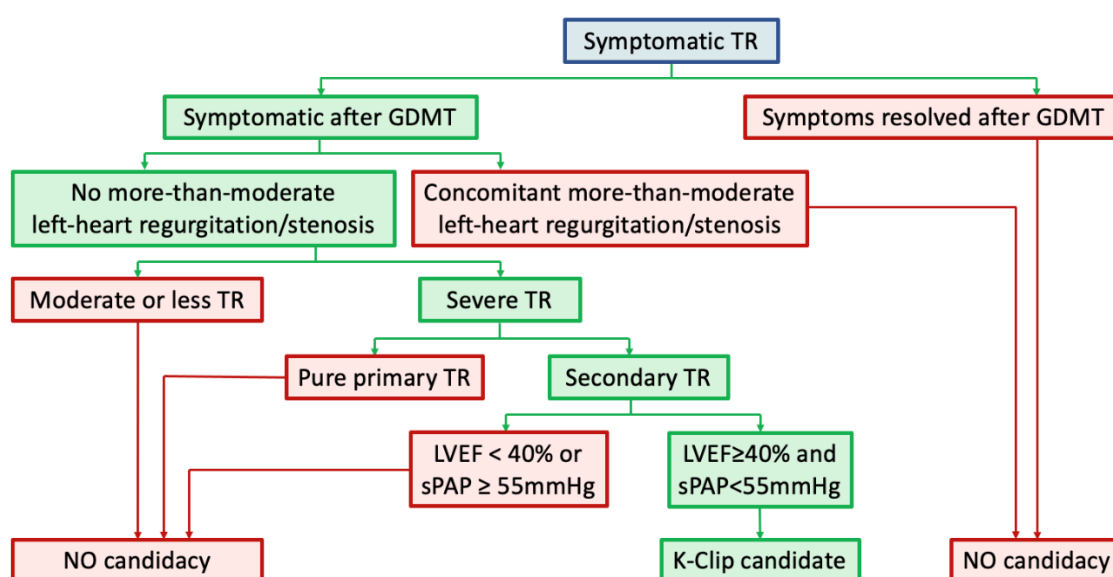

**Figure S1.** Patient screening protocol for the First-in-human study of K-Clip™ system. TR, tricuspid regurgitation; GDMT, guideline-directed medical therapy; LVEF, left ventricular ejection fraction; sPAP, systolic pulmonary arterial pressure.

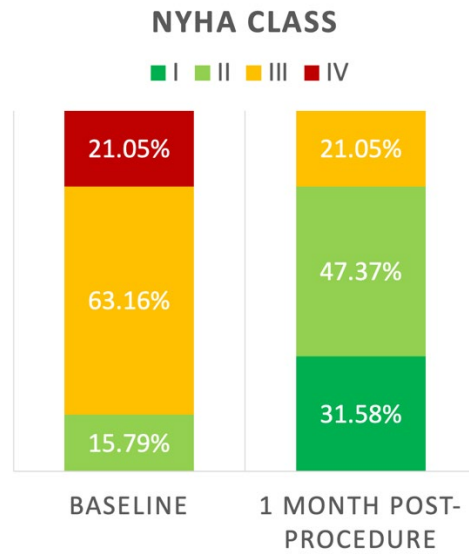

**Figure S2.** NYHA functional status was improved after implantation of the K-Clip™ system. NYHA, New York Heart Association.

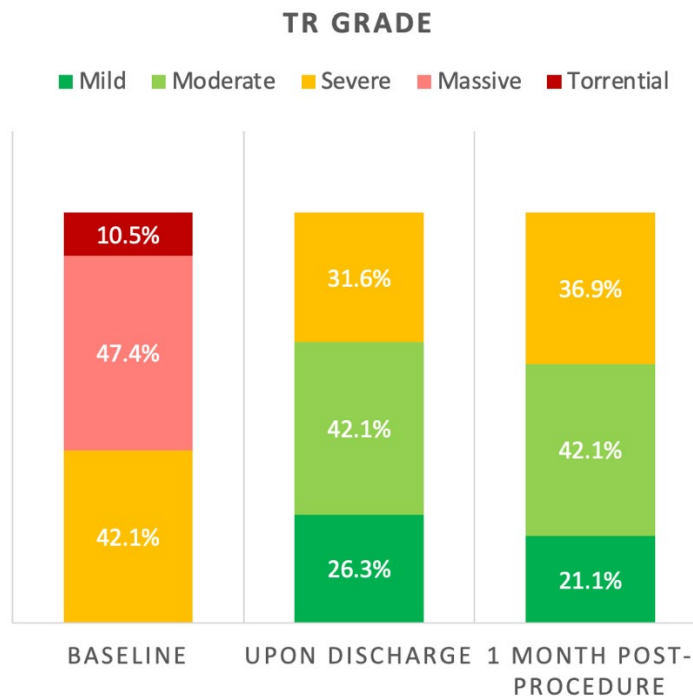

**Figure S3.** TR was reduced immediately and 1-month post-procedure. TR, tricuspid regurgitation.

**Table S1.** Baseline demographics of patients received K-Clip implantation.

| Variable                           | N=19      |
|------------------------------------|-----------|
| Age                                | 73.4±8.7  |
| Gender (Male)                      | 63.2%     |
| NYHA Class                         |           |
| I                                  | 0         |
| II                                 | 3(15.8%)  |
| III                                | 12(63.2%) |
| IV                                 | 4(21.1%)  |
| Hypertension                       | 9(47.3%)  |
| Diabetes                           | 4(21.1%)  |
| Atrial fibrillation (AF)           | 15(78.9%) |
| Previous mitral valve surgery      | 4(21.1%)  |
| I-II degree atrioventricular block | 0         |
| Myocardial infarction              | 0         |
| Stroke                             | 0         |
| Percutaneous cardiac intervention  | 1(5.2%)   |
| ICD                                | 2(10.5%)  |
| Renal failure                      | 0         |
| Previous annulus intervention      | 0         |
| STS score, %                       | 7.9±3.1   |

NYHA, New York Heart Association; ICD, intra-cardiac defibrillator; STS, society of thoracic surgeons.

**Table S2.** Baseline characteristics of tricuspid regurgitation by echocardiography.

| Variable                                          | N=19                  |
|---------------------------------------------------|-----------------------|
| TR grade                                          |                       |
| Severe                                            | 8(42.1%)              |
| Massive                                           | 9(47.3%)              |
| Torrential                                        | 2(10.5%)              |
| TR etiology                                       |                       |
| Functional                                        | 15(78.9%)             |
| Secondary to AF                                   | 11(57.8%)             |
| Secondary to left heart disease                   | 4(21.1%)              |
| ICD-lead related                                  | 0                     |
| Degenerative                                      | 0                     |
| Mixed etiology                                    | 4(21.1%)              |
| Right atrium (major*minor axis), mm               | (72±10.8)*(43.8±7.3)  |
| Right ventricle (basal diameter), mm              | 48±9                  |
| Tricuspid annulus diameter (major*minor axis), mm | (47.2±5.0)*(43.8±7.3) |
| Vena contracta width (major*minor axis), mm       | (15.3±5.9)*(14.8±5.4) |

TR, tricuspid regurgitation; AF, atrial fibrillation; ICD, intra-cardiac defibrillator. \*, means "times".

**Table S3.** Summary of the procedural safety of K-Clip implantation.

| Adverse Events                  | N=19         |                    |
|---------------------------------|--------------|--------------------|
|                                 | Event counts | Subject counts (%) |
| All adverse events (AE)         | 3            | 2 (10.53)          |
| AE during screening             | 0            | 0                  |
| AE during treatment             | 3            | 2 (10.53)          |
| Relation to test device         |              |                    |
| Related                         | 1            | 1(5.26)            |
| Not related                     | 2            | 1(5.26)            |
| Severity of AE                  |              |                    |
| Mild                            | 3            | 2 (10.53)          |
| Moderate                        | 0            | 0                  |
| Severe                          | 0            | 0                  |
| All severe adverse events (SAE) |              |                    |
| SAE during screening            | 0            | 0                  |
| SAE during treatment            | 1            | 1(5.26)            |
| Relation to test device         |              |                    |
| Related                         | 0            | 0                  |
| Not related                     | 1            | 1(5.26)            |
| SAE leading to death            | 0            | 0                  |
